# Supplementary material for: Social learning under acute stress
Source: PLOS journal article supplement (doi:10.1371/journal.pone.0202335), 2018-08-22
Supplement: S1 (10.1371/journal.pone.0202335.s001) [file journal.pone.0202335.s001]

# Supporting online material - file 1

## Section A

**Table A1: Randomization check**

|                        |                 | Total | Control | Treatment | p-value |
|------------------------|-----------------|-------|---------|-----------|---------|
| Gender                 | Male (%)        | 52.1  | 52.9    | 51.4      | 0.87    |
|                        | Female (%)      | 47.9  | 47.1    | 48.6      |         |
|                        | Count           | 140   | 70      | 70        |         |
| Age                    | Mean            | 22.3  | 22.6    | 22.1      | 0.51    |
|                        | SD              | 2.4   | 2.8     | 1.8       |         |
|                        | Valid N         | 140   | 70      | 70        |         |
| Education              | Elementary (%)  | 0.0   | 0.0     | 0.0       | 0.35    |
|                        | High school (%) | 55.7  | 60.0    | 51.4      |         |
|                        | University (%)  | 44.3  | 40.0    | 48.6      |         |
|                        | Count           | 140   | 70      | 70        |         |
| Openness to experience | Mean            | 36.8  | 37.1    | 36.5      | 0.26    |
|                        | SD              | 5.3   | 5.6     | 5.0       |         |
|                        | Valid N         | 140   | 70      | 70        |         |
| Conscientiousness      | Mean            | 33.6  | 34.0    | 33.2      | 0.38    |
|                        | SD              | 6.2   | 6.6     | 5.9       |         |
|                        | Valid N         | 140   | 70      | 70        |         |
| Extraversion           | Mean            | 33.2  | 32.1    | 34.3      | 0.08    |
|                        | SD              | 7.7   | 7.9     | 7.4       |         |
|                        | Valid N         | 140   | 70      | 70        |         |
| Agreeableness          | Mean            | 36.2  | 35.9    | 36.5      | 0.33    |
|                        | SD              | 5.8   | 5.1     | 6.4       |         |
|                        | Valid N         | 140   | 70      | 70        |         |
| Neuroticism            | Mean            | 30.2  | 29.0    | 31.4      | 0.08    |
|                        | SD              | 7.8   | 8.1     | 7.4       |         |
|                        | Valid N         | 140   | 70      | 70        |         |
| Conformity             | Mean            | 28.6  | 28.7    | 28.5      | 0.92    |
|                        | SD              | 5.7   | 6.0     | 5.4       |         |
|                        | Valid N         | 140.0 | 70.0    | 70.0      |         |

*Note:* p-values from the two-sample Wilcoxon rank-sum test.

5 **Table A2: Manipulation check**

|                                       |         | Control | Treatment | p-value<br>z-value<br>Cohens d | Male    |           | Female  |           |
|---------------------------------------|---------|---------|-----------|--------------------------------|---------|-----------|---------|-----------|
|                                       |         |         |           |                                | Control | Treatment | Control | Treatment |
| Cortisol 1 - Before treatment         | Mean    | 7.76    | 8.21      | 0.83                           | 6.81    | 8.45      | 8.80    | 7.95      |
|                                       | SD      | 3.89    | 4.39      | -0.21                          | 4.11    | 4.59      | 3.41    | 4.22      |
|                                       | Valid N | 69      | 70        | -0.1                           | 36      | 36        | 33      | 34        |
| Cortisol 2 - After treatment          | Mean    | 6.97    | 16.79     | 0.00                           | 7.02    | 19.27     | 6.92    | 14.17     |
|                                       | SD      | 4.16    | 11.96     | -6.22                          | 5.20    | 12.10     | 2.62    | 11.39     |
|                                       | Valid N | 70      | 70        | -1.1                           | 37      | 36        | 33      | 34        |
| Cortisol 3 - Before risk-task         | Mean    | 7.07    | 16.13     | 0.00                           | 7.07    | 17.99     | 7.06    | 14.09     |
|                                       | SD      | 4.24    | 11.64     | -6.05                          | 5.13    | 11.00     | 3.06    | 12.15     |
|                                       | Valid N | 69      | 69        | -1.04                          | 36      | 36        | 33      | 33        |
| Heart rate - Before treatment         | Mean    | 80.68   | 82.43     | 0.44                           | 79.91   | 78.89     | 81.63   | 86.09     |
|                                       | SD      | 12.77   | 12.53     | -0.77                          | 12.89   | 12.40     | 12.79   | 11.76     |
|                                       | Valid N | 65      | 65        | -0.14                          | 36      | 33        | 29      | 32        |
| Heart rate - During treatment         | Mean    | 92.92   | 100.99    | 0.07                           | 90.88   | 96.31     | 95.74   | 105.97    |
|                                       | SD      | 20.41   | 19.25     | -1.84                          | 14.95   | 16.08     | 26.25   | 21.27     |
|                                       | Valid N | 62      | 64        | -0.41                          | 36      | 33        | 26      | 31        |
| Heart rate - after treatment          | Mean    | 79.87   | 81.70     | 0.32                           | 76.22   | 79.06     | 84.43   | 84.41     |
|                                       | SD      | 16.01   | 12.88     | -0.99                          | 12.98   | 12.64     | 18.37   | 12.74     |
|                                       | Valid N | 63      | 65        | -0.12                          | 35      | 33        | 28      | 32        |
| MDM Good-Bad 1 - before Treatment     | Mean    | 22.89   | 23.36     | 0.29                           | 23.41   | 23.19     | 22.30   | 23.53     |
|                                       | SD      | 4.40    | 4.45      | -1.05                          | 4.75    | 4.70      | 3.97    | 4.23      |
|                                       | Valid N | 70      | 70        | -0.11                          | 37      | 36        | 33      | 34        |
| MDM Good-Bad 2 - after Treatment      | Mean    | 21.31   | 17.79     | 0.00                           | 22.00   | 18.31     | 20.55   | 17.24     |
|                                       | SD      | 4.57    | 5.71      | 3.60                           | 4.76    | 5.83      | 4.30    | 5.62      |
|                                       | Valid N | 70      | 70        | 0.68                           | 37      | 36        | 33      | 34        |
| MDM Awake-Tired 1 - before Treatment  | Mean    | 20.41   | 20.44     | 0.83                           | 21.14   | 21.60     | 19.61   | 19.24     |
|                                       | SD      | 5.53    | 4.83      | -0.22                          | 5.53    | 5.10      | 5.50    | 4.29      |
|                                       | Valid N | 70      | 69        | -0.001                         | 37      | 35        | 33      | 34        |
| MDM Awake-Tired 2 - after Treatment   | Mean    | 18.83   | 19.91     | 0.11                           | 19.54   | 20.81     | 18.00   | 18.97     |
|                                       | SD      | 5.15    | 5.36      | -1.59                          | 4.29    | 5.04      | 5.95    | 5.61      |
|                                       | Valid N | 69      | 70        | -0.1                           | 37      | 36        | 32      | 34        |
| MDM Calm-Nervous 1 - before Treatment | Mean    | 21.79   | 22.91     | 0.23                           | 21.97   | 22.47     | 21.58   | 23.39     |
|                                       | SD      | 4.77    | 4.49      | -1.20                          | 4.91    | 4.10      | 4.68    | 4.89      |
|                                       | Valid N | 70      | 69        | -0.24                          | 37      | 36        | 33      | 33        |
| MDM Calm-Nervous 2 - after Treatment  | Mean    | 20.10   | 17.22     | 0.00                           | 20.87   | 18.00     | 19.24   | 16.36     |
|                                       | SD      | 4.70    | 4.85      | 3.44                           | 4.76    | 4.52      | 4.54    | 5.13      |
|                                       | Valid N | 70      | 69        | 0.61                           | 37      | 36        | 33      | 33        |

6 *Note:* p-values from the two-sample Wilcoxon rank-sum test.

7 **Table A3: Descriptive statistics of main independent variables.**

|                |      | Control                      | Treatment | Control               | Treatment |
|----------------|------|------------------------------|-----------|-----------------------|-----------|
|                |      | (1)                          | (2)       | (3)                   | (4)       |
|                |      | <i>Private signals</i>       |           | <i>Public signals</i> |           |
| VARIABLE       |      | <i>Before TSST procedure</i> |           |                       |           |
| Decision       | Mean | 20.9                         | 21.5      | 23.6                  | 24.5      |
|                | SD   | 15.8                         | 15.7      | 16.8                  | 16.9      |
| Difference     | Mean | 3.1                          | 4.2       | 4.1                   | 4.9       |
|                | SD   | 13.5                         | 12.9      | 25.2                  | 24.6      |
| Difference abs | Mean | 8.8                          | 9.3       | 17.8                  | 17.5      |
|                | SD   | 10.7                         | 9.9       | 18.2                  | 17.9      |
|                |      | <i>After TSST procedure</i>  |           |                       |           |
| Decision       | Mean | 22.0                         | 22.5      | 25.5                  | 26.3      |
|                | SD   | 16.8                         | 16.7      | 18.1                  | 18.0      |
| Difference     | Mean | 2.5                          | 2.3       | 3.3                   | 4.1       |
|                | SD   | 13.5                         | 12.9      | 21.6                  | 21.9      |
| Difference abs | Mean | 8.7                          | 9.1       | 15.1                  | 15.6      |
|                | SD   | 10.6                         | 9.3       | 15.7                  | 15.9      |

8

9

10

**Table A4: Regression analysis, dependent variable *Decision*, only decisions after Private signals.**

|                                       | (1)                    | (2)                 | (3)                 | (4)                   | (5)                   | (6)                   |
|---------------------------------------|------------------------|---------------------|---------------------|-----------------------|-----------------------|-----------------------|
|                                       | <b>Private signals</b> |                     |                     |                       |                       |                       |
| Dependent variable                    | <b>Decision</b>        |                     |                     |                       |                       |                       |
| Treatment                             | 0.535<br>(1.323)       | 0.535<br>(1.251)    | -0.384<br>(1.458)   | 1.309<br>(1.207)      | 1.077<br>(1.732)      | 2.176<br>(1.767)      |
| Round after TSST                      | 1.105<br>(0.733)       | 1.105<br>(0.733)    | 1.105<br>(0.734)    | 1.105<br>(0.734)      | -0.482<br>(1.286)     | -0.731<br>(1.374)     |
| Treatment X Round after TSST          | -0.0460<br>(0.958)     | -0.0460<br>(0.959)  | 0.0181<br>(1.199)   | -0.0460<br>(0.960)    | -1.264<br>(1.489)     | -1.770<br>(1.801)     |
| Female                                |                        |                     | -2.424<br>(1.719)   | -1.697<br>(1.368)     | -0.329<br>(1.156)     | 1.288<br>(1.301)      |
| Age                                   |                        |                     |                     | 0.506**<br>(0.215)    | 0.577***<br>(0.213)   | 0.485**<br>(0.219)    |
| Openness to experience                |                        |                     |                     | -0.0525<br>(0.135)    | -0.137<br>(0.128)     | -0.131<br>(0.133)     |
| Conscientiousness                     |                        |                     |                     | 0.0753<br>(0.0888)    | 0.0926<br>(0.0851)    | 0.151*<br>(0.0898)    |
| Extraversion                          |                        |                     |                     | 0.0838<br>(0.0937)    | 0.123<br>(0.0835)     | 0.0974<br>(0.0891)    |
| Agreeableness                         |                        |                     |                     | -0.159<br>(0.106)     | -0.149<br>(0.100)     | -0.153<br>(0.110)     |
| Neuroticism                           |                        |                     |                     | -0.239***<br>(0.0787) | -0.208***<br>(0.0696) | -0.207***<br>(0.0703) |
| Conformity                            |                        |                     |                     | -0.0462<br>(0.119)    | -0.0572<br>(0.0993)   | -0.0310<br>(0.100)    |
| True                                  |                        |                     |                     |                       | 0.619***<br>(0.0551)  | 0.637***<br>(0.0616)  |
| True X Treatment                      |                        |                     |                     |                       | 0.0243<br>(0.0724)    | -0.0280<br>(0.0986)   |
| True X Round after TSST               |                        |                     |                     |                       | 0.0293<br>(0.0446)    | -0.0145<br>(0.0628)   |
| True X Treatment X Round after TSST   |                        |                     |                     |                       | 0.0147<br>(0.0532)    | 0.0403<br>(0.0875)    |
| Female X Treatment                    |                        |                     | 1.963<br>(2.587)    |                       |                       |                       |
| Female X Treatment X Round after TSST |                        |                     | -0.132<br>(1.229)   |                       |                       |                       |
| Constant                              | 20.92***<br>(0.933)    | 19.60***<br>(2.444) | 20.68***<br>(2.461) | 20.02**<br>(9.172)    | 7.271<br>(9.230)      | 4.375<br>(8.735)      |
| Observations                          | 5,320                  | 5,320               | 5,320               | 5,320                 | 5,320                 | 1,820                 |
| R-squared                             | 0.001                  | 0.017               | 0.020               | 0.034                 | 0.525                 | 0.400                 |
| Session FE                            | NO                     | YES                 | YES                 | YES                   | YES                   | YES                   |
| F                                     | 1.810                  | 1.803               | 1.588               | 2.023                 | 32.47                 | 22.39                 |

11

*Notes:* Dependent variable *Decision*. Robust standard errors clustered on the individual level in the parentheses.

12

Column 6 restricts the observations to the first private signal in a given round. \*\*\*  $p < 0.01$ , \*\*  $p < 0.05$ , \*  $p < 0.1$ .

**Table A5: Regression analysis, dependent variable *Decision*, only decisions after Public signals.**

|                                       | (1)                   | (2)                 | (3)                 | (4)                  | (5)                   | (6)                  |
|---------------------------------------|-----------------------|---------------------|---------------------|----------------------|-----------------------|----------------------|
|                                       | <b>Public signals</b> |                     |                     |                      |                       |                      |
| Dependent variable                    | <b>Decision</b>       |                     |                     |                      |                       |                      |
| Treatment                             | 0.855<br>(1.519)      | 0.855<br>(1.483)    | -0.162<br>(1.858)   | 1.536<br>(1.442)     | 1.053<br>(1.576)      | 1.634<br>(1.607)     |
| Round after TSST                      | 1.854*<br>(0.983)     | 1.854*<br>(0.984)   | 1.854*<br>(0.984)   | 1.854*<br>(0.985)    | -1.706<br>(1.071)     | -3.227**<br>(1.335)  |
| Treatment X Round after TSST          | -0.0610<br>(1.218)    | -0.0610<br>(1.219)  | 0.199<br>(1.367)    | -0.0610<br>(1.220)   | 0.779<br>(1.307)      | 0.292<br>(1.681)     |
| Female                                |                       |                     | -3.859**<br>(1.817) | -2.683*<br>(1.530)   | -1.584<br>(1.395)     | -1.205<br>(1.511)    |
| Openness to experience                |                       |                     |                     | -0.0553<br>(0.150)   | -0.101<br>(0.156)     | -0.112<br>(0.168)    |
| Conscientiousness                     |                       |                     |                     | -0.00418<br>(0.0986) | -0.00336<br>(0.0992)  | 0.0268<br>(0.111)    |
| Extraversion                          |                       |                     |                     | 0.132<br>(0.105)     | 0.143<br>(0.102)      | 0.155<br>(0.108)     |
| Agreeableness                         |                       |                     |                     | -0.271**<br>(0.134)  | -0.275**<br>(0.134)   | -0.280**<br>(0.139)  |
| Neuroticism                           |                       |                     |                     | -0.231**<br>(0.0927) | -0.225***<br>(0.0856) | -0.217**<br>(0.0925) |
| Conformity                            |                       |                     |                     | -0.0286<br>(0.139)   | -0.0611<br>(0.128)    | -0.146<br>(0.132)    |
| Age                                   |                       |                     |                     | 0.536**<br>(0.243)   | 0.620**<br>(0.253)    | 0.595**<br>(0.265)   |
| True                                  |                       |                     |                     |                      | 0.263***<br>(0.0245)  | 0.162***<br>(0.0320) |
| True X Treatment                      |                       |                     |                     |                      | 0.0217<br>(0.0323)    | -0.0501<br>(0.0450)  |
| True X Round after TSST               |                       |                     |                     |                      | 0.129***<br>(0.0237)  | 0.245***<br>(0.0411) |
| True X Round after TSST X Treatment   |                       |                     |                     |                      | -0.0386<br>(0.0311)   | 0.0270<br>(0.0559)   |
| Female X Treatment                    |                       |                     | 2.206<br>(3.029)    |                      |                       |                      |
| Female X Treatment X Round after TSST |                       |                     | -0.535<br>(1.443)   |                      |                       |                      |
| Constant                              | 23.65***<br>(0.974)   | 22.27***<br>(2.972) | 23.95***<br>(3.046) | 26.96**<br>(10.47)   | 21.33*<br>(10.88)     | 25.66**<br>(11.19)   |
| Observations                          | 3,920                 | 3,920               | 3,920               | 3,920                | 3,920                 | 1,820                |
| R-squared                             | 0.003                 | 0.015               | 0.022               | 0.039                | 0.280                 | 0.248                |
| Session FE                            | NO                    | YES                 | YES                 | YES                  | YES                   | YES                  |
| F                                     | 3.479                 | 1.855               | 1.671               | 2.237                | 38.49                 | 30.42                |

Notes: Dependent variable *Decision*. Robust standard errors clustered on the individual level in the parentheses.  
Column 6 restricts the observations to the first public signal in a given round.\*\*\* p<0.01, \*\* p<0.05, \* p<0.1

18 **Table A6: Classification of subjects whether they reacted to the treatment procedure according the increase**  
 19 **in cortisol above 1.5 nmol/l above the baseline.**

|        |           | Responder - Cortisol<br>increase above 1.5<br>nmol/l |     |       |
|--------|-----------|------------------------------------------------------|-----|-------|
|        |           | No                                                   | Yes | Total |
| Group: | Control   | 56                                                   | 12  | 68    |
|        | Treatment | 18                                                   | 52  | 70    |
| Total  |           | 74                                                   | 64  | 138   |

20 **Table A7: Classification of subjects whether they reacted to the treatment procedure according the increase**  
 21 **in cortisol above 15.5 % above the baseline.**

|        |           | Responder - Cortisol<br>increase above<br>15.5% |     |       |
|--------|-----------|-------------------------------------------------|-----|-------|
|        |           | No                                              | Yes | Total |
| Group: | Control   | 51                                              | 17  | 68    |
|        | Treatment | 16                                              | 54  | 70    |
| Total  |           | 67                                              | 71  | 138   |

22

23

24 **Table A8: Regression analysis - correlations.**

| Dependent variable                          | (1)                 | (2)                 | (3)                 | (4)                          | (5)                 | (6)                 | (7)                 | (8)                  |
|---------------------------------------------|---------------------|---------------------|---------------------|------------------------------|---------------------|---------------------|---------------------|----------------------|
|                                             | Decision            |                     |                     | Difference in absolute value |                     |                     |                     |                      |
| Responder                                   | 1.173<br>(1.467)    | 1.361<br>(1.434)    | 1.017<br>(1.437)    | 1.168<br>(1.386)             | 0.482<br>(0.958)    | 0.427<br>(0.926)    | 0.935<br>(0.917)    | 0.914<br>(0.845)     |
| Round after TSST                            | 1.485**<br>(0.687)  | 1.488**<br>(0.688)  | 1.466**<br>(0.689)  | -1.905**<br>(0.751)          | -0.0698<br>(0.505)  | -0.0699<br>(0.505)  | -0.0585<br>(0.505)  | -0.617<br>(0.688)    |
| Responder X<br>Round after TSST             | -0.848<br>(1.043)   | -0.854<br>(1.043)   | -0.811<br>(1.045)   | -0.968<br>(0.914)            | -0.125<br>(0.610)   | -0.125<br>(0.611)   | -0.147<br>(0.611)   | -0.228<br>(0.607)    |
| Public                                      | 2.787***<br>(0.938) | 2.840***<br>(0.935) | 2.425***<br>(0.911) | 2.031**<br>(0.860)           | 9.010***<br>(0.706) | 9.008***<br>(0.681) | 9.222***<br>(0.680) | 9.469***<br>(0.676)  |
| Public X Treatment                          | 0.171<br>(1.670)    | 0.0667<br>(1.659)   | 0.885<br>(1.608)    | 0.120<br>(1.387)             | -0.714<br>(1.075)   | -0.710<br>(1.038)   | -1.133<br>(1.003)   | -0.431<br>(1.063)    |
| Public X Round after<br>TSST                | 0.395<br>(0.891)    | 0.393<br>(0.892)    | 0.405<br>(0.892)    | -0.234<br>(0.785)            | 2.602***<br>(0.627) | 2.602***<br>(0.628) | 2.608***<br>(0.627) | 2.288***<br>(0.615)  |
| Public X Round after<br>TSST<br>X Treatment | 0.567<br>(1.302)    | 0.570<br>(1.303)    | 0.547<br>(1.304)    | 1.021<br>(1.118)             | 0.842<br>(0.841)    | 0.842<br>(0.842)    | 0.853<br>(0.841)    | 0.0777<br>(0.908)    |
| True                                        |                     |                     |                     | 0.364***<br>(0.0274)         |                     |                     |                     | 0.276***<br>(0.0341) |
| True X Treatment                            |                     |                     |                     | 0.0301<br>(0.0347)           |                     |                     |                     | -0.0319<br>(0.0366)  |
| True X Round after<br>TSST                  |                     |                     |                     | 0.141***<br>(0.0222)         |                     |                     |                     | 0.0437*<br>(0.0256)  |
| True X Round after<br>TSST<br>X Treatment   |                     |                     |                     | -0.0204<br>(0.0267)          |                     |                     |                     | 0.0399<br>(0.0256)   |
| Constant                                    | 20.64***<br>(1.059) | 19.14***<br>(2.574) | 21.08**<br>(9.576)  | 13.73<br>(9.856)             | 8.837***<br>(0.725) | 11.86***<br>(2.105) | 15.63**<br>(7.660)  | 20.83***<br>(6.944)  |
| Observations                                | 9,108               | 9,108               | 9,108               | 9,108                        | 9,108               | 9,108               | 9,108               | 9,108                |
| R-squared                                   | 0.011               | 0.025               | 0.044               | 0.379                        | 0.073               | 0.084               | 0.094               | 0.250                |
| Session FE                                  | NO                  | YES                 | YES                 | YES                          | NO                  | YES                 | YES                 | YES                  |
| Controls                                    | NO                  | NO                  | YES                 | YES                          | NO                  | NO                  | YES                 | YES                  |
| F                                           | 13.12               | 7.350               | 5.642               | 41.75                        | 85.56               | 42.81               | 33.05               | 47.68                |

25 *Note: Responder* defined as 1 if an individual showed an increase of cortisol higher than 1.5 nmol/l or 15.5% above  
26 the baseline, 0 otherwise. Dependent variables *Decision* (cols. 1-4) and *Difference* in absolute value (cols. 5-8).  
27 Robust standard errors clustered on the individual level in the parentheses. \*\*\* p<0.01, \*\* p<0.05, \* p<0.1

28 **Table A9: Random effects panel data estimation.**

| Dependent variable                    | (1)                 | (2)                 | (3)                 | (4)                          | (5)                 | (6)                 | (7)                 | (8)                  |
|---------------------------------------|---------------------|---------------------|---------------------|------------------------------|---------------------|---------------------|---------------------|----------------------|
|                                       | Decision            |                     |                     | Difference in absolute value |                     |                     |                     |                      |
| Treatment                             | 0.535<br>(1.323)    | 0.535<br>(1.256)    | 1.270<br>(1.222)    | 1.368<br>(1.263)             | 0.499<br>(0.979)    | 0.499<br>(0.946)    | 0.315<br>(0.954)    | 0.965<br>(1.366)     |
| Round after TSST                      | 1.105<br>(0.733)    | 1.105<br>(0.733)    | 1.105<br>(0.734)    | -2.071**<br>(0.922)          | -0.0728<br>(0.538)  | -0.0728<br>(0.539)  | -0.0728<br>(0.539)  | -0.321<br>(0.919)    |
| Treatment X Round after TSST          | -0.0460<br>(0.959)  | -0.0460<br>(0.959)  | -0.0460<br>(0.959)  | -0.431<br>(1.058)            | -0.110<br>(0.669)   | -0.110<br>(0.669)   | -0.110<br>(0.669)   | -0.567<br>(1.060)    |
| Public                                | 2.729***<br>(0.653) | 2.729***<br>(0.654) | 2.729***<br>(0.654) | 2.079***<br>(0.642)          | 8.998***<br>(0.564) | 8.998***<br>(0.564) | 8.998***<br>(0.564) | 9.429***<br>(0.513)  |
| Public X Treatment                    | 0.320<br>(0.936)    | 0.320<br>(0.936)    | 0.320<br>(0.937)    | 0.0626<br>(0.917)            | -0.801<br>(0.890)   | -0.801<br>(0.891)   | -0.801<br>(0.891)   | -0.530<br>(0.768)    |
| Public X Round after TSST             | 0.749<br>(0.720)    | 0.749<br>(0.721)    | 0.749<br>(0.721)    | 0.0107<br>(0.712)            | 2.594***<br>(0.638) | 2.594***<br>(0.639) | 2.594***<br>(0.639) | 2.434***<br>(0.582)  |
| Public X Round after TSST X Treatment | -0.0150<br>(0.945)  | -0.0150<br>(0.946)  | -0.0150<br>(0.946)  | 0.664<br>(0.909)             | 0.851<br>(0.899)    | 0.851<br>(0.899)    | 0.851<br>(0.900)    | 0.405<br>(0.827)     |
| True                                  |                     |                     |                     | 0.379***<br>(0.0276)         |                     |                     |                     | 0.251***<br>(0.0360) |
| True X Treatment                      |                     |                     |                     | 0.00157<br>(0.0377)          |                     |                     |                     | -0.0433<br>(0.0462)  |
| True X Round after TSST               |                     |                     |                     | 0.131***<br>(0.0239)         |                     |                     |                     | 0.0339<br>(0.0292)   |
| True X Round after TSST X Treatment   |                     |                     |                     | -0.0110<br>(0.0289)          |                     |                     |                     | 0.0444<br>(0.0342)   |
| Constant                              | 20.92***<br>(0.933) | 19.58***<br>(2.576) | 21.81**<br>(9.486)  | 14.06<br>(9.615)             | 8.809***<br>(0.706) | 11.87***<br>(2.150) | 15.38**<br>(7.806)  | 20.08***<br>(7.095)  |
| Observations                          | 9,240               | 9,240               | 9,240               | 9,240                        | 9,240               | 9,240               | 9,240               | 9,240                |
| Number of units                       | 140                 | 140                 | 140                 | 140                          | 140                 | 140                 | 140                 | 140                  |
| Session FE                            | NO                  | YES                 | YES                 | YES                          | NO                  | YES                 | YES                 | YES                  |
| Controls                              | NO                  | NO                  | YES                 | YES                          | NO                  | NO                  | YES                 | YES                  |

29 *Note:* Random effects panel data analysis with the unit of observation being an individual and time dimension being  
30 the serial order number of a decision across all rounds. Dependent variables *Decision* (cols. 1-4) and *Difference* in  
31 absolute value (cols. 5-8). Robust standard errors clustered on the individual level in the parentheses. \*\*\* p<0.01, \*\*  
32 p<0.05, \* p<0.1



**Table A10: Regression analysis – accounting for time by Round No. and Serial No, dependent variable *Decision*.**

| VARIABLES              | (1)                 | (2)                  | (3)                  | (4)                  | (5)                   | (6)                   | (7)                   |
|------------------------|---------------------|----------------------|----------------------|----------------------|-----------------------|-----------------------|-----------------------|
|                        | Decision            |                      |                      |                      |                       |                       |                       |
| Treatment              | 0.489<br>(1.268)    | -1.572<br>(2.859)    | -2.752<br>(2.565)    | -2.157<br>(2.615)    | -1.165<br>(2.269)     | -2.098<br>(2.121)     | -1.508<br>(2.176)     |
| Public                 | 3.478***<br>(0.475) | 3.441***<br>(0.474)  | 2.073***<br>(0.507)  | 2.070***<br>(0.507)  | 3.733***<br>(0.485)   | 2.282***<br>(0.524)   | 2.278***<br>(0.524)   |
| Public X Treatment     | 0.305<br>(0.789)    | 0.314<br>(0.789)     | 0.714<br>(0.774)     | 0.718<br>(0.774)     | 0.214<br>(0.799)      | 0.584<br>(0.790)      | 0.589<br>(0.790)      |
| Round No.              |                     | -0.679***<br>(0.158) | -0.451***<br>(0.135) | -0.451***<br>(0.136) |                       |                       |                       |
| Treatment X Round No.  |                     | 0.177<br>(0.246)     | 0.241<br>(0.200)     | 0.240<br>(0.199)     |                       |                       |                       |
| True                   |                     |                      | 0.507***<br>(0.0345) | 0.508***<br>(0.0329) |                       | 0.508***<br>(0.0345)  | 0.510***<br>(0.0329)  |
| True X Treatment       |                     |                      | 0.00246<br>(0.0407)  | 0.000900<br>(0.0397) |                       | 0.00207<br>(0.0408)   | 0.000506<br>(0.0397)  |
| Serial No.             |                     |                      |                      |                      | -0.104***<br>(0.0316) | 0.0761***<br>(0.0269) | 0.0760***<br>(0.0269) |
| Treatment X Serial No. |                     |                      |                      |                      | 0.0367<br>(0.0489)    | 0.0482<br>(0.0394)    | 0.0481<br>(0.0394)    |
| Constant               | 20.44***<br>(3.130) | 28.38***<br>(3.546)  | 16.09***<br>(3.904)  | 21.80*<br>(11.29)    | 25.11***<br>(3.367)   | 14.23***<br>(3.792)   | 19.93*<br>(11.23)     |
| Observations           | 5,740               | 5,740                | 5,740                | 5,740                | 5,740                 | 5,740                 | 5,740                 |
| R-squared              | 0.022               | 0.029                | 0.399                | 0.416                | 0.026                 | 0.398                 | 0.415                 |
| Session FE             | YES                 | YES                  | YES                  | YES                  | YES                   | YES                   | YES                   |
| Controls               | NO                  | NO                   | NO                   | YES                  | NO                    | NO                    | YES                   |
| F                      | 8.949               | 9.305                | 54.74                | 46.49                | 8.646                 | 54.49                 | 46.08                 |

*Notes:* Dependent variable *Decision*. Robust standard errors clustered on the individual level in the parentheses.

*Round No* indicates the order number of a round in a session; *Serial No.* indicates the order number of a decision in a session.\*\*\* p<0.01, \*\* p<0.05, \* p<0.1

**Table A11: Regression analysis – accounting for time by Round No. and Serial No, dependent variable Difference in absolute value**

| VARIABLES              | (1)                          | (2)                 | (3)                   | (4)                   | (5)                 | (6)                   | (7)                   |
|------------------------|------------------------------|---------------------|-----------------------|-----------------------|---------------------|-----------------------|-----------------------|
|                        | Difference in absolute value |                     |                       |                       |                     |                       |                       |
| Treatment              | 0.389<br>(0.830)             | 1.363<br>(1.793)    | 1.612<br>(2.100)      | 1.341<br>(2.114)      | 1.148<br>(1.465)    | 1.310<br>(1.830)      | 1.043<br>(1.847)      |
| Public                 | 6.404***<br>(0.462)          | 6.400***<br>(0.461) | 7.043***<br>(0.419)   | 7.036***<br>(0.421)   | 6.431***<br>(0.472) | 7.110***<br>(0.430)   | 7.102***<br>(0.432)   |
| Public X Treatment     | 0.0493<br>(0.670)            | 0.0447<br>(0.669)   | -0.165<br>(0.599)     | -0.164<br>(0.601)     | 0.0907<br>(0.685)   | -0.107<br>(0.616)     | -0.106<br>(0.619)     |
| Round No.              |                              | -0.0800<br>(0.0926) | -0.187**<br>(0.0792)  | -0.186**<br>(0.0796)  |                     |                       |                       |
| Treatment X Round No.  |                              | -0.0834<br>(0.140)  | -0.107<br>(0.122)     | -0.107<br>(0.123)     |                     |                       |                       |
| True                   |                              |                     | -0.239***<br>(0.0360) | -0.236***<br>(0.0351) |                     | -0.238***<br>(0.0359) | -0.235***<br>(0.0350) |
| True X Treatment       |                              |                     | 0.0102<br>(0.0451)    | 0.0108<br>(0.0443)    |                     | 0.0106<br>(0.0451)    | 0.0112<br>(0.0443)    |
| Serial No.             |                              |                     |                       |                       | -0.0108<br>(0.0186) | -0.0238<br>(0.0158)   | -0.0236<br>(0.0158)   |
| Treatment X Serial No. |                              |                     |                       |                       | -0.0169<br>(0.0279) | -0.0213<br>(0.0242)   | -0.0212<br>(0.0242)   |
| Constant               | 12.41***<br>(2.565)          | 13.35***<br>(2.483) | 19.12***<br>(2.851)   | 22.34***<br>(7.913)   | 12.90***<br>(2.470) | 17.99***<br>(2.765)   | 21.21***<br>(7.897)   |
| Observations           | 5,740                        | 5,740               | 5,740                 | 5,740                 | 5,740               | 5,740                 | 5,740                 |
| R-squared              | 0.073                        | 0.073               | 0.213                 | 0.222                 | 0.073               | 0.212                 | 0.221                 |
| Session FE             | YES                          | YES                 | YES                   | YES                   | YES                 | YES                   | YES                   |
| Controls               | NO                           | NO                  | NO                    | YES                   | NO                  | NO                    | YES                   |
| F                      | 34.43                        | 29.52               | 38.96                 | 29.87                 | 29.55               | 39.15                 | 29.95                 |

Notes: Dependent variable *Difference* in absolute value. Robust standard errors clustered on the individual level in the parentheses. *Round No* indicates the order number of a round in a session; *Serial No.* indicates the order number of a decision in a session. \*\*\* p<0.01, \*\* p<0.05, \* p<0.1

46 **Table A12: Regression analysis with controlling for risk-preferences.**

|                                           | (1)                  | (2)                  | (3)                  | (4)                  | (5)                           | (6)                  | (7)                  | (8)                  |
|-------------------------------------------|----------------------|----------------------|----------------------|----------------------|-------------------------------|----------------------|----------------------|----------------------|
| Signals:                                  | Private              |                      | Public               |                      | Private                       |                      | Public               |                      |
| Dependent variable                        | Decision             |                      |                      |                      | Difference in absolute values |                      |                      |                      |
| Treatment                                 | 1.077<br>(1.732)     | 1.119<br>(1.770)     | 1.053<br>(1.576)     | 1.196<br>(1.559)     | 0.982<br>(1.944)              | 0.763<br>(1.981)     | 0.398<br>(1.373)     | 0.186<br>(1.399)     |
| Round after TSST                          | -0.482<br>(1.286)    | -0.430<br>(1.348)    | -1.706<br>(1.071)    | -1.452<br>(1.115)    | 0.259<br>(1.345)              | 0.121<br>(1.416)     | -1.905**<br>(0.944)  | -1.921*<br>(0.992)   |
| Treatment X<br>Round after TSST           | -1.264<br>(1.489)    | -1.312<br>(1.547)    | 0.779<br>(1.307)     | 0.458<br>(1.345)     | -2.044<br>(1.573)             | -1.892<br>(1.634)    | 0.328<br>(1.184)     | 0.351<br>(1.221)     |
| True                                      | 0.619***<br>(0.0551) | 0.619***<br>(0.0570) | 0.263***<br>(0.0245) | 0.261***<br>(0.0250) | -0.115*<br>(0.0624)           | -0.126*<br>(0.0650)  | 0.339***<br>(0.0363) | 0.344***<br>(0.0374) |
| True X Treatment                          | 0.0243<br>(0.0724)   | 0.0233<br>(0.0744)   | 0.0217<br>(0.0323)   | 0.0168<br>(0.0328)   | -0.0471<br>(0.0752)           | -0.0352<br>(0.0770)  | -0.0338<br>(0.0484)  | -0.0277<br>(0.0492)  |
| True X Round after<br>TSST                | 0.0293<br>(0.0446)   | 0.0297<br>(0.0461)   | 0.129***<br>(0.0237) | 0.127***<br>(0.0242) | 0.00730<br>(0.0523)           | 0.000320<br>(0.0547) | 0.00606<br>(0.0299)  | 0.00388<br>(0.0312)  |
| True X Round after<br>TSST<br>X Treatment | 0.0147<br>(0.0532)   | 0.0143<br>(0.0545)   | -0.0386<br>(0.0311)  | -0.0330<br>(0.0313)  | 0.110*<br>(0.0624)            | 0.102<br>(0.0644)    | 0.0206<br>(0.0373)   | 0.0224<br>(0.0383)   |
| Certainty equivalent                      |                      | 10.81***<br>(3.844)  |                      | 16.00***<br>(4.283)  |                               | -0.0765<br>(2.720)   |                      | -1.398<br>(2.235)    |
| Female                                    |                      |                      |                      |                      |                               |                      | 1.052*<br>(0.623)    |                      |
| Constant                                  | 7.271<br>(9.230)     | 1.576<br>(8.615)     | 21.33*<br>(10.88)    | 13.64<br>(10.52)     | 13.81*<br>(7.850)             | 12.66<br>(7.714)     | 36.27***<br>(6.434)  | 36.76***<br>(6.252)  |
| Observations                              | 5,320                | 5,168                | 3,920                | 3,808                | 5,320                         | 5,168                | 3,920                | 3,808                |
| R-squared                                 | 0.525                | 0.531                | 0.280                | 0.293                | 0.085                         | 0.088                | 0.299                | 0.303                |
| Session FE                                | YES                  | YES                  | YES                  | YES                  | YES                           | YES                  | YES                  | YES                  |
| Controls                                  | YES                  | YES                  | YES                  | YES                  | YES                           | YES                  | YES                  | YES                  |
| F                                         | 32.47                | 31.02                | 38.49                | 35.49                | 2.397                         | 2.355                | 19.06                | 20.67                |

47 *Note:* Dependent variables *Decision* (cols. 1-4) and *Difference* in absolute value (cols. 5-8). Robust standard errors  
48 clustered on the individual level in the parentheses. Certainty equivalent is calculated from an incentivized risk-  
49 elicitation task and may introduce endogeneity into estimation since it could be affected by treatment. It is rescaled  
50 to lie between 0 and 1 where 0.5 indicates risk-neutrality, lower values indicate risk-aversion and higher values  
51 indicate risk-seeking. \*\*\* p<0.01, \*\* p<0.05, \* p<0.1

53 **Table A13: Regression analysis with standardized variables for calculation of MDE.**

| VARIABLES                               | (1)                     | (2)                   | (3)                   | (4)                   |
|-----------------------------------------|-------------------------|-----------------------|-----------------------|-----------------------|
|                                         | Decision - standardized |                       |                       |                       |
| Treatment                               | 0.0315<br>(0.0779)      | 0.0315<br>(0.0739)    | 0.0747<br>(0.0719)    | 0.0856<br>(0.0628)    |
| Round after TSST                        | 0.0650<br>(0.0431)      | 0.0650<br>(0.0432)    | 0.0650<br>(0.0432)    | 0.0330<br>(0.0384)    |
| Treatment X Round after TSST            | -0.00271<br>(0.0564)    | -0.00271<br>(0.0564)  | -0.00271<br>(0.0565)  | -0.0416<br>(0.0484)   |
| Public                                  | 0.161***<br>(0.0384)    | 0.161***<br>(0.0385)  | 0.161***<br>(0.0385)  | 0.123***<br>(0.0378)  |
| Public X Treatment                      | 0.0188<br>(0.0551)      | 0.0188<br>(0.0551)    | 0.0188<br>(0.0551)    | 0.000942<br>(0.0541)  |
| Public X Round after TSST               | 0.0441<br>(0.0424)      | 0.0441<br>(0.0424)    | 0.0441<br>(0.0424)    | -0.000548<br>(0.0417) |
| Public X Round after TSST X Treatment   | -0.000882<br>(0.0556)   | -0.000882<br>(0.0557) | -0.000882<br>(0.0557) | 0.0410<br>(0.0536)    |
| True - standardized                     |                         |                       |                       | 0.468***<br>(0.0366)  |
| True std X Treatment                    |                         |                       |                       | 0.0302<br>(0.0476)    |
| True std X Round after TSST             |                         |                       |                       | 0.180***<br>(0.0326)  |
| True std X Round after TSST X Treatment |                         |                       |                       | -0.0323<br>(0.0399)   |
| Constant                                | -0.138**<br>(0.0549)    | -0.217<br>(0.152)     | 0.596<br>(0.509)      | 0.684<br>(0.528)      |
| Observations                            | 9,240                   | 9,240                 | 9,240                 | 9,240                 |
| R-squared                               | 0.011                   | 0.024                 | 0.043                 | 0.379                 |
| Session FE                              | NO                      | YES                   | YES                   | YES                   |
| Controls                                | NO                      | NO                    | YES                   | YES                   |
| F                                       | 14.52                   | 7.943                 | 6.116                 | 41.76                 |
| MDE (Treatment * Round after stress)    | <b>0.158</b>            | <b>0.158</b>          | <b>0.159</b>          | <b>0.136</b>          |

54 *Note:* Robust standard errors in parentheses. Mean Detectable Effect (MDE) calculated as 2.8 \* SE of  
55 coefficient of interest. \*\*\* p<0.01, \*\* p<0.05, \* p<0.1

## Section B - discussion of the role of risk-preferences

This part is devoted to the discussion of the influence of risk-preferences on the relative weight of the signals in the decision-making procedure. The subjects were paid according to the quadratic scoring rule which is incentive compatible only for risk-neutral preferences. In the measurement of risk-preferences I obtained a wide variety of estimates of individual risk-aversion, which calls the employed payment scheme into question in terms of incentive compatibility. It is not clear whether this poses negative impact on the main results (treatment differences) since the procedure was constant across the two groups. A problem may arise when the risk-aversion interacts with treatment [83]. The subjects that become more risk-averse in treatment group may then face different incentives than the subjects in the control group: they should generally state their estimates of probability closer to the safe midpoint relative to the control group which would serve as a confounding factor. It is not clear though whether more risk-averse subjects should put more or less weight on the public signal relative to private, but generally this change in behavior due to change in risk-attitudes would be observed in the dif-in-dif regressions, though with no differences between reactions to public and private signals. I do not observe any significant differences in behavior between treatment and control groups in any of the steps of analysis, which may indicate either that the reaction to signals did not really depend on risk-preferences (maybe rather on ambiguity aversion) or there were two opposing forces: increased risk-aversion decreased the weight of both private and public signals while increased reward responsiveness under stress cancelled the effect on behavior mediated by the change in risk-attitudes [77]. Even though I do dispose with the individual risk-parameters (except for four subjects), I should not enter it as a control variable in the regression equation, because it is also determined by treatment and it thus raises concerns of potential bias stemming from the endogeneity of the relationship. Having this limitation in mind, I perform another robustness check to examine the stability of the coefficient of interest when I add the variable *Certainty equivalent* that represents the individual risk-attitudes into the three main regression

80 specifications. The results are presented in Table S12 where it is evident that indeed the coefficients of  
81 interest are fairly stable in terms of magnitude as well as their significance.

82

## Section C – output from G\_Power 3.1

84 **t tests** – Linear multiple regression: Fixed model, single regression coefficient

85 **Analysis:** Sensitivity: Compute required effect size

86 **Input:** Tail(s) = One

87  $\alpha$  err prob = 0.05

88 Power (1- $\beta$  err prob) = 0.8

89 Total sample size = 140

90 Number of predictors = 4

91 **Output:** Noncentrality parameter  $\delta$  = 2.4990297

92 Critical t = 1.6562191

93 Df = 135

94 **Effect size  $f^2$**  = **0.0446082**

95 **t tests** – Linear multiple regression: Fixed model, single regression coefficient

96 **Analysis:** Sensitivity: Compute required effect size

97 **Input:** Tail(s) = Two

98  $\alpha$  err prob = 0.05

99 Power (1- $\beta$  err prob) = 0.8

100 Total sample size = 140

101 Number of predictors = 4

102 **Output:** Noncentrality parameter  $\delta$  = 2.8217088

103 Critical t = 1.9776923

104 Df = 135

105 **Effect size  $f^2$**  = **0.0568717**

106 **t tests** – Linear multiple regression: Fixed model, single regression coefficient

107 **Analysis:** Sensitivity: Compute required effect size

108 **Input:** Tail(s) = Two

109  $\alpha$  err prob = 0.05

110 Power (1- $\beta$  err prob) = 0.8

111 Total sample size = 140

112 Number of predictors = 13

113 **Output:** Noncentrality parameter  $\delta$  = 2.8231616

114 Critical t = 1.9789706

115 Df = 126

116 **Effect size  $f^2$**  = **0.0569303**

117

118

## 119 Section D – Details of Calculation of the Optimal Decisions in 120 the Probabilistic Task – Variable *True*

121 For the sake of simplicity I assume that all subjects are rational and have symmetric expectations about  
122 other subjects which allows me to calculate the optimal response based on the information contained in  
123 the signals using the Bayes formula.

$$P(B|A) = \frac{P(B \cap A)}{P(A)}$$

124 For the value of *True* after a certain number of signals, I assume all information a subject had received  
125 prior to the current decision in a given round was taken into account, while the preceding rounds were  
126 ignored. I also assume that a decision maker is rational and disregards any irrelevant information in the  
127 sense that there is no interdependence between the answers in the "What-if" scenario. Further, I assume  
128 that for calculating the public information, subjects also took into account the possibility that when the  
129 other subjects stated exactly the same probabilities of both bags having been selected, the resulting signal  
130 was chosen at random. For the particular calculation of each value of *True* we first looked at the  
131 composition of the balls in the bags. Let's define  $b$  the number of blue balls in the Blue bag,  $y$  the number  
132 of yellow balls in the Yellow bag, and  $n$  the total number of the balls in the bag. Note that  $\Pr(b|B) =$   
133  $\Pr(y|Y)$ , which denotes the probability of drawing the blue ball out of a Blue bag and drawing the yellow  
134 ball from the Yellow bag, respectively.

135 The optimal move after the first signal, which was always private, is calculated as follows: First the  
136 probability of drawing a blue ball given the composition is calculated:  $\Pr(b|B) = b/n$ , the probability of  
137 drawing the yellow ball is complementary, i.e.  $\Pr(y|B) = 1 - b/n$ . The value of *True* is however the



138 probability of the bag being Blue, given this signal, which is  $\Pr(B|b) = \frac{\Pr(b|B)}{\Pr(b|B) + \Pr(y|B)}$ . The second  
 139 signal could still be only a private one; it was the second draw with replacement from the same chosen  
 140 bag. The optimal reaction is then calculated in the following way: first I need the chance each type of a  
 141 signal composition could have appeared:  $\Pr(bb|B) = \Pr(yy|Y) = \Pr(b|B)^2$ ;  $\Pr(yb|B) = \Pr(yb|Y) =$   
 142  $\Pr(by|B) = 2 \Pr(b|B) \Pr(y|B)$  and  $\Pr(bb|Y) = \Pr(yy|B) = \Pr(y|B)^2$ . To calculate the values of *True*,  
 143 I used these in the following fashion:  $\Pr(B|bb) = \frac{\Pr(bb|B)}{\Pr(bb|B) + \Pr(by|B)}$ ,  $\Pr(B|yy) = \frac{\Pr(yy|B)}{\Pr(yy|B) + \Pr(by|B)}$  and  
 144  $\Pr(B|by) = \frac{\Pr(by|B)}{\Pr(by|B) + \Pr(yb|B)} = 50 \%$ . In the similar way, the rest of the private signals was calculated,  
 145 when there were three or more private draws with replacement.  
 146 The first public signal could come at the earliest after two private ones. It was presented as a stylized bag  
 147 indicating the color of the bag that the other player stated to be more probable. Let's label the blue bag  
 148 presented as the decision of another participant as "*B*". If there was only one bag presented, it means that  
 149 this other participant had received either (bb), or (by) and there was a 50 % chance of choosing B. Then  
 150  $\Pr("B"|B) = \Pr("Y"|Y) = \Pr(bb|B) + 1/2 \Pr(yb|B)$  and  $\Pr("B"|Y) = \Pr("Y"|B) = \Pr(bb|Y) +$   
 151  $1/2 \Pr(yb|Y)$ . From this I derive that the probability of observing blue in both private signals as well as  
 152 in the bag of another participant:  $\Pr(bb"B"|B) = \Pr(bb|B) \Pr("B"|B)$  and similarly the probabilities of  
 153 other events that could have happened:  $\Pr(bb"B"|Y) = \Pr(bb|Y) \Pr("B"|Y)$ ;  $\Pr(yy"B"|Y) =$   
 154  $\Pr(bb"Y"|B) = \Pr(yy|Y) \Pr("B"|Y)$ ;  $\Pr(yy"B"|B) = \Pr(bb"Y"|Y) = \Pr(yy|B) \Pr("B"|B)$ ;  
 155  $\Pr(yb"B"|B) = \Pr(yb"Y"|Y) = \Pr(yb|B) \Pr("B"|B)$  and  $\Pr(yb"B"|Y) = \Pr(yb"Y"|B) =$   
 156  $\Pr(yb|Y) \Pr("B"|Y)$ . These are necessary for the derivation of the probabilities that a chosen bag was  
 157 blue, given the signals. If the private signals were both blue (bb) and the other participant's bag was also  
 158 blue ("B"), then  $\Pr(B|bb"B") = \frac{\Pr(bb"B"|B)}{\Pr(bb"B"|B) + \Pr(bb"B"|Y)}$  and similarly if the observed other participant's  
 159 bag was yellow:  $\Pr(B|bb"Y") = \frac{\Pr(bb"Y"|B)}{\Pr(bb"Y"|B) + \Pr(bb"Y"|Y)}$ . If both private signals were yellow, we get the

160 following for other participant's bag being blue and yellow, respectively:

161 
$$\Pr(B|yy"Y") = \frac{\Pr(yy"Y"|B)}{\Pr(yy"Y"|B) + \Pr(yy"Y"|Y)} \text{ and } \Pr(B|yy"B") = \frac{\Pr(yy"B"|B)}{\Pr(yy"B"|B) + \Pr(yy"B"|Y)}.$$
 For the case of a

162 mixed private signal, ( $yb$ ), the public signal is : 
$$\Pr(B|yb"B") = \frac{\Pr(yb"B"|B)}{\Pr(yb"B"|B) + \Pr(yb"B"|Y)} = \Pr("B"|B).$$
 In

163 the same fashion, I calculate the optimal probabilities for more private and public signals.
